# Supplementary material for: An unusual stereoselectivity in the anomeric substitution with carbamates promoted by HNTf2
Source: Royal Society of Chemistry journal article supplement (doi:10.1039/b615725d), 2006-12-08

SUPPORTING INFORMATION

PROTON NMR AND CARBON NMR SPECTRA

for the  
communication  
entitled

**An Unusual Stereoselectivity in the Anomeric Substitution with Carbamates Promoted by HNTf<sub>2</sub>.**

authored by

Changhong Ko and Richard P. Hsung\*

*Division of Pharmaceutical Sciences and Department of Chemistry, 7111 Rennebohm Hall, 777 Highland Avenue  
University of Wisconsin at Madison, Madison, WI 53705-2222*

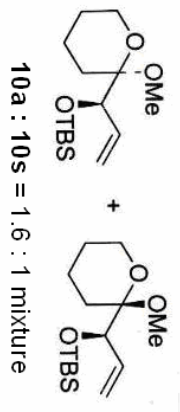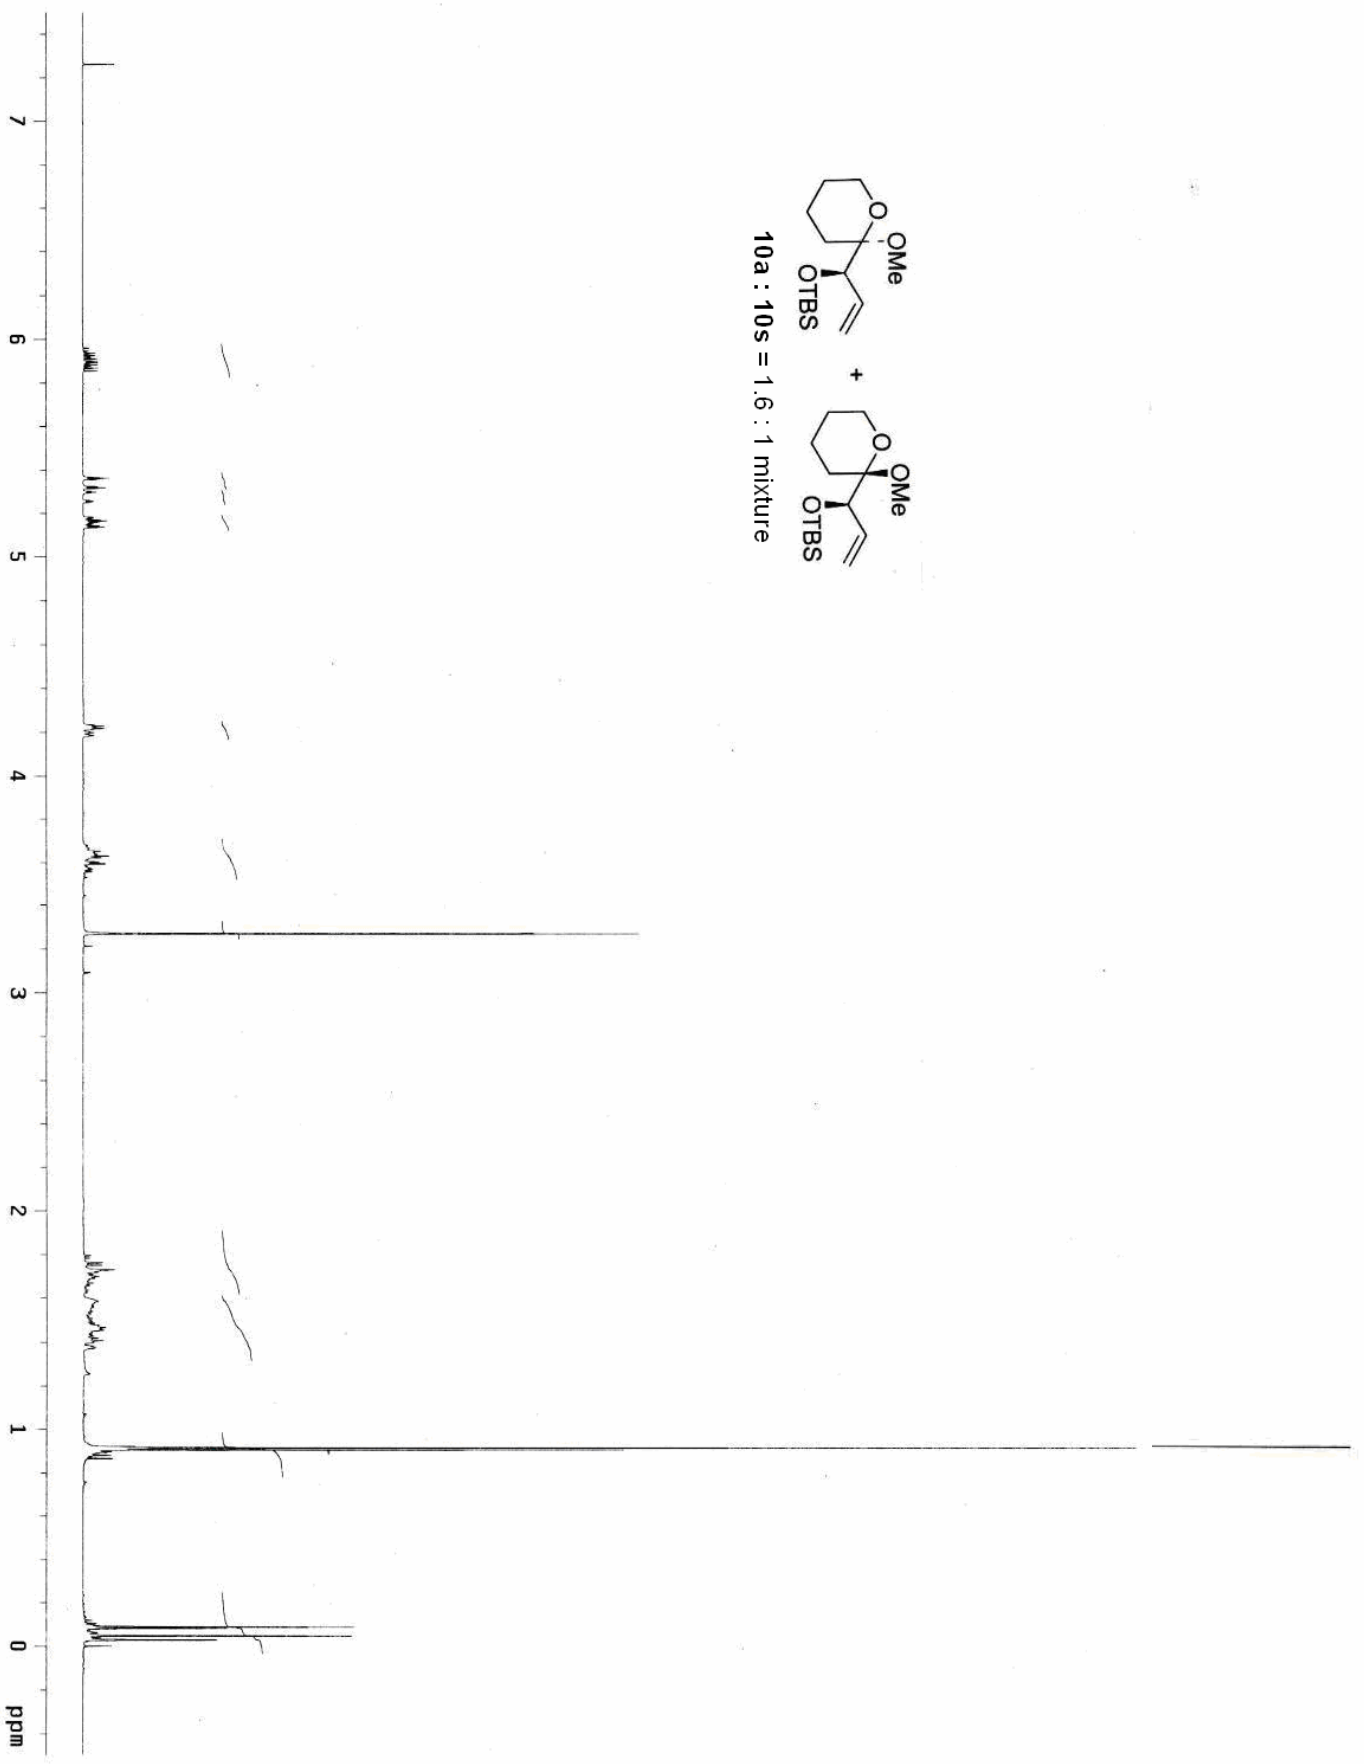

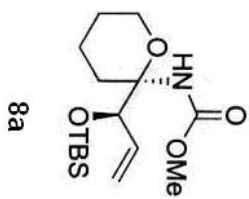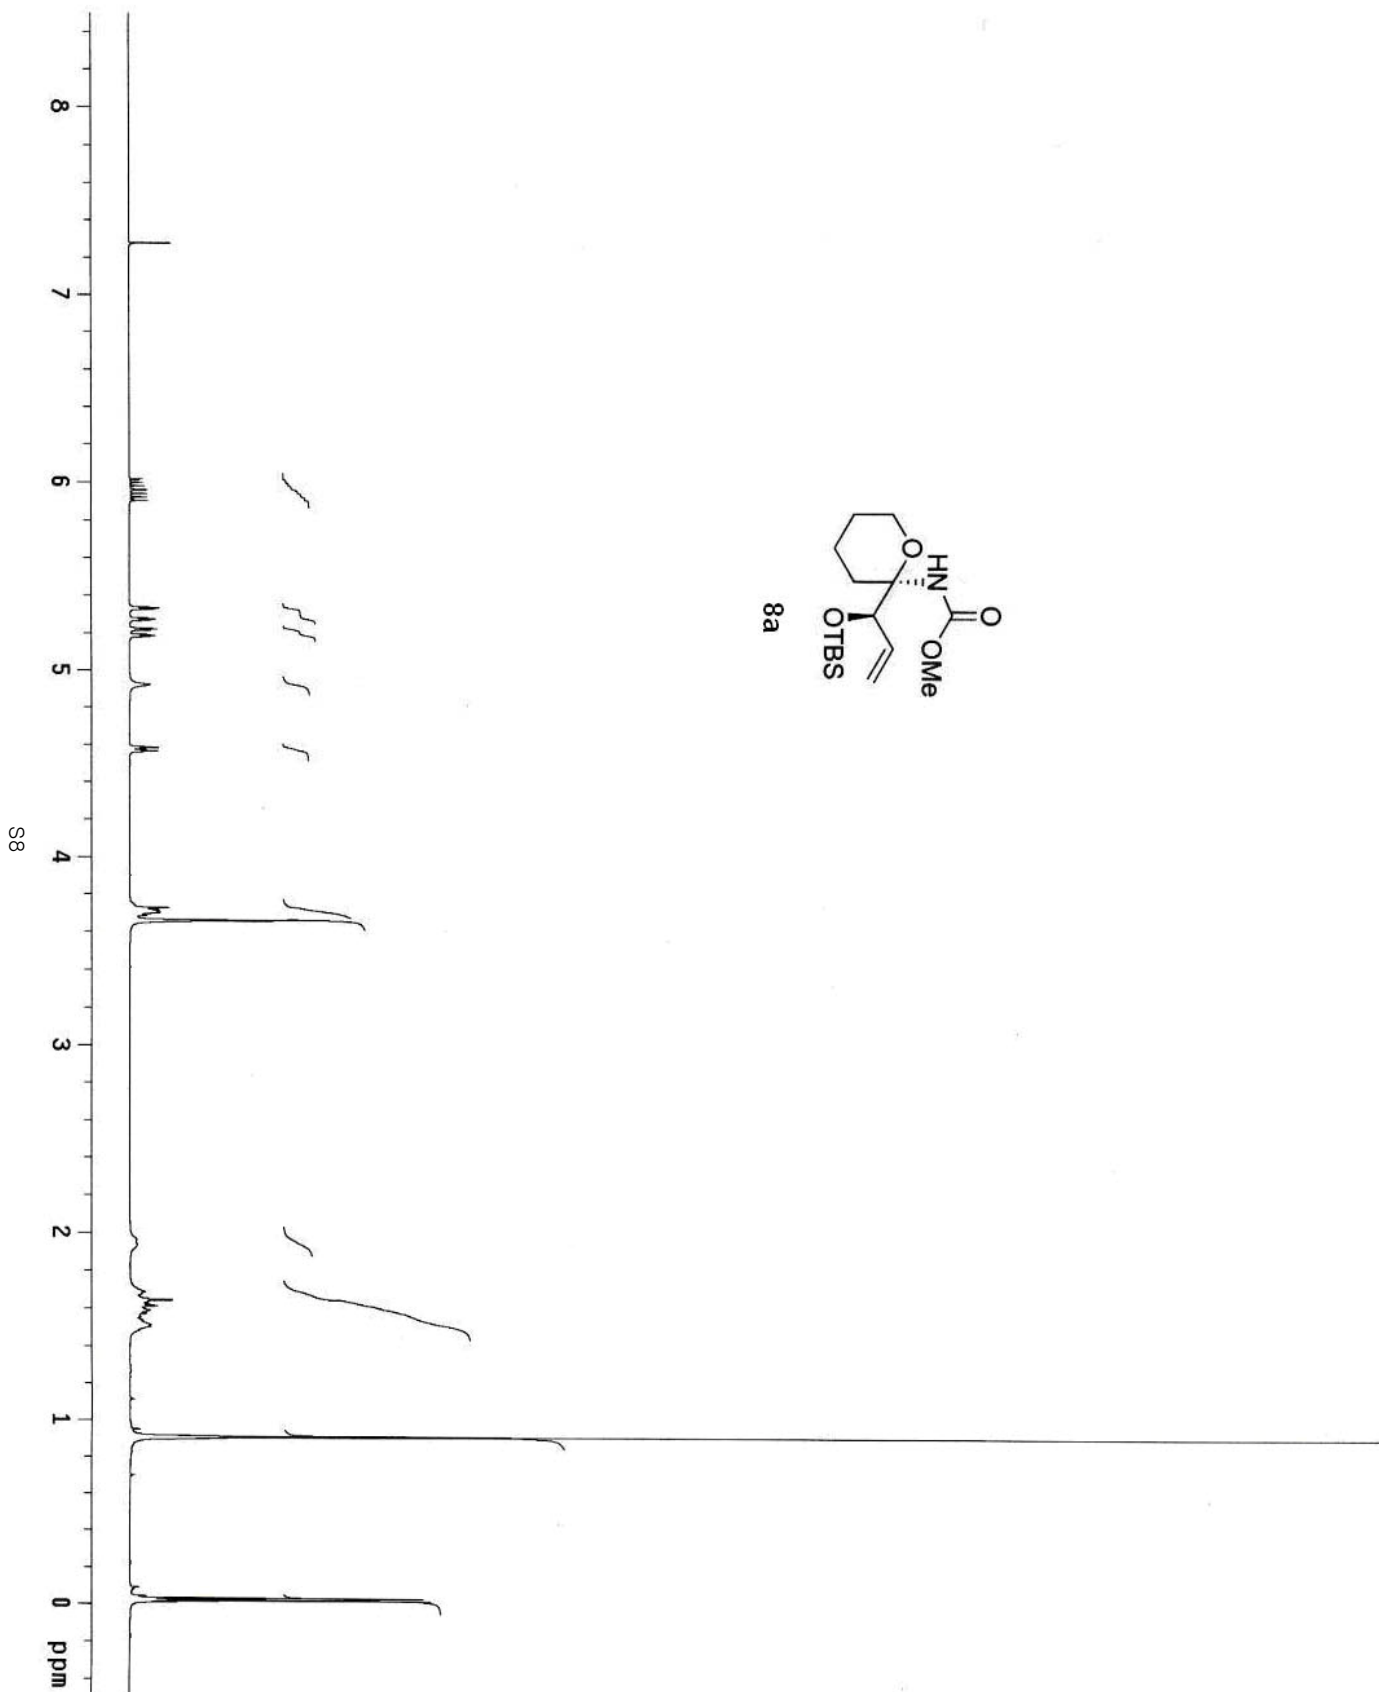

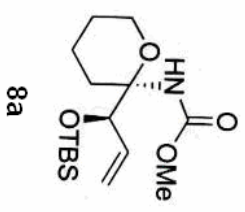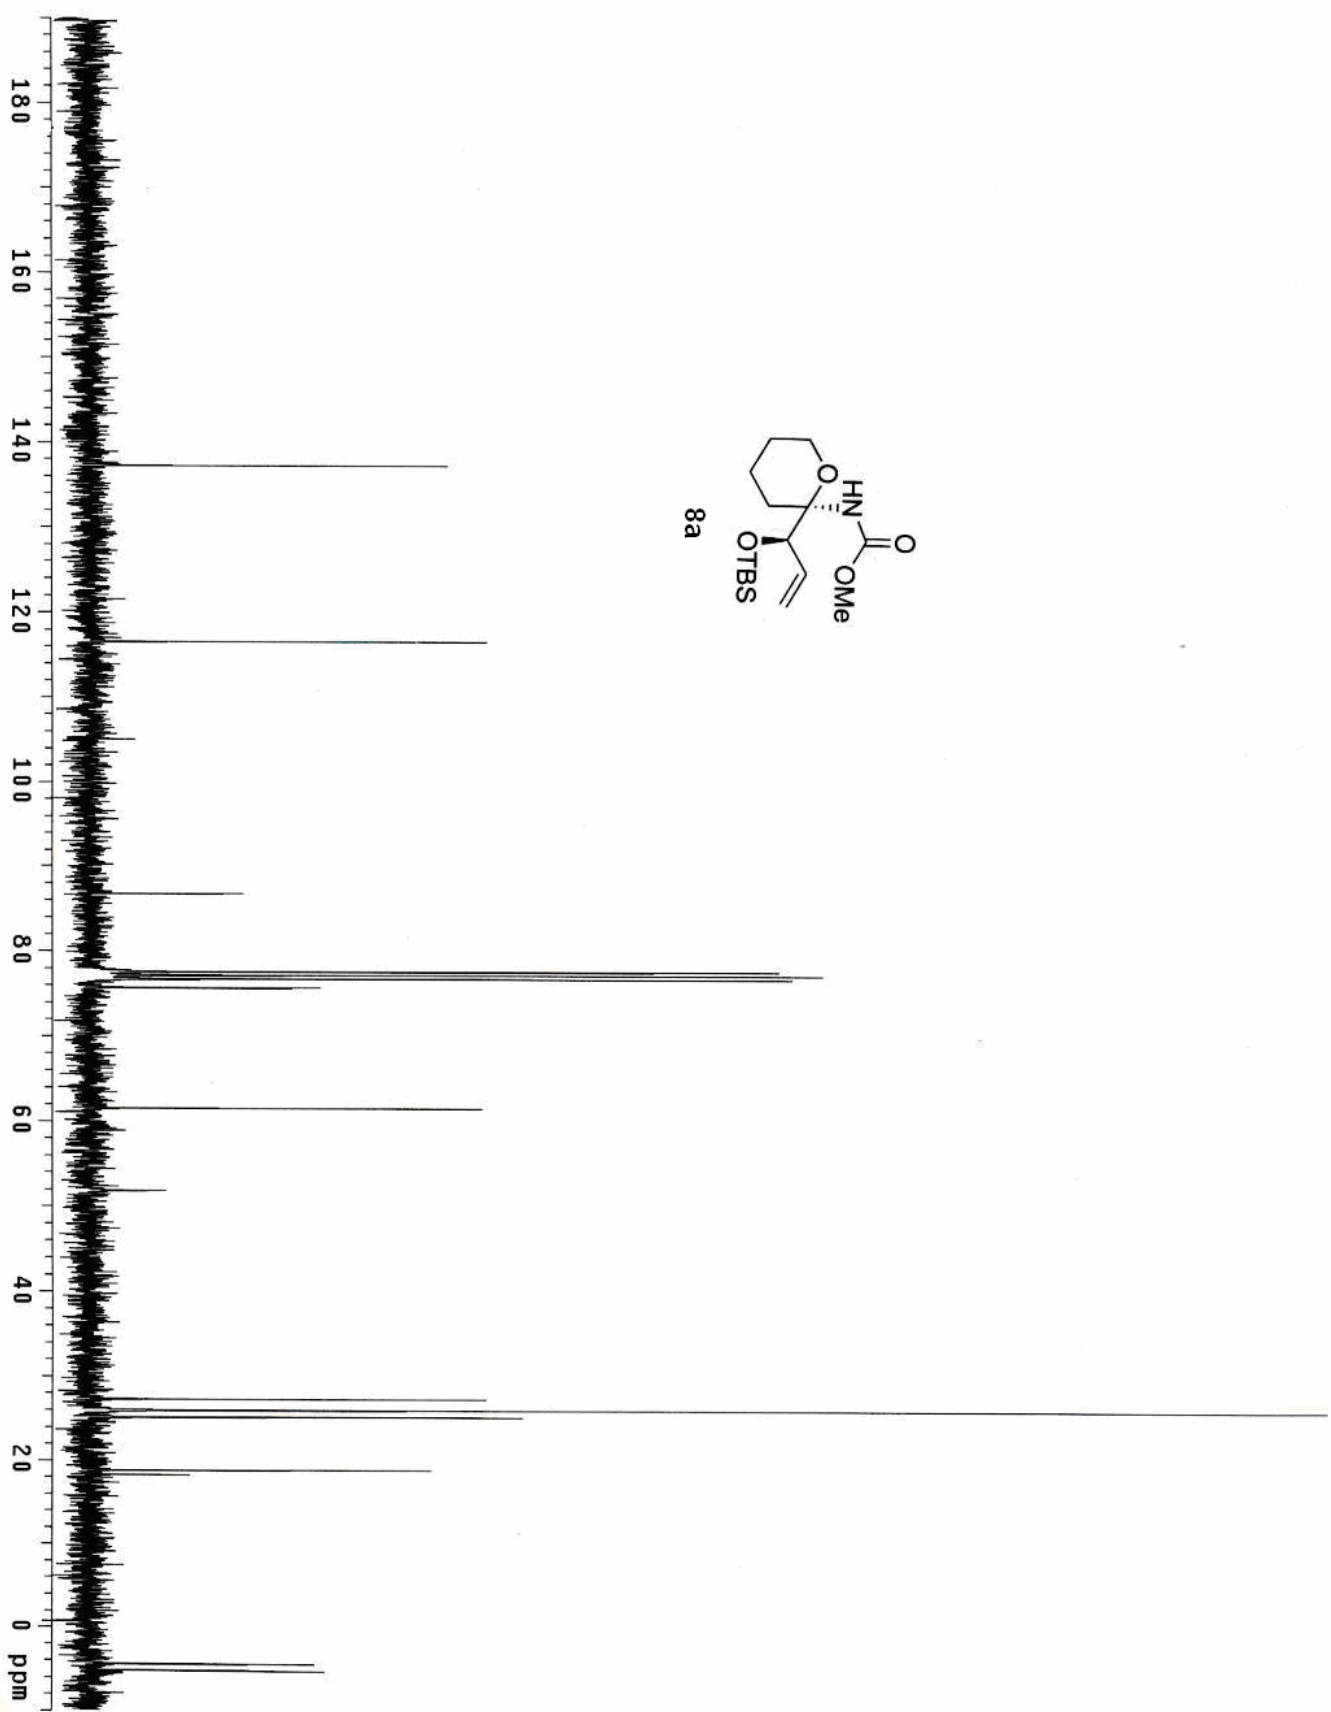

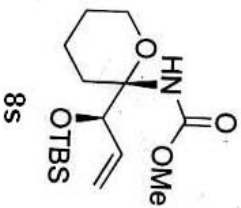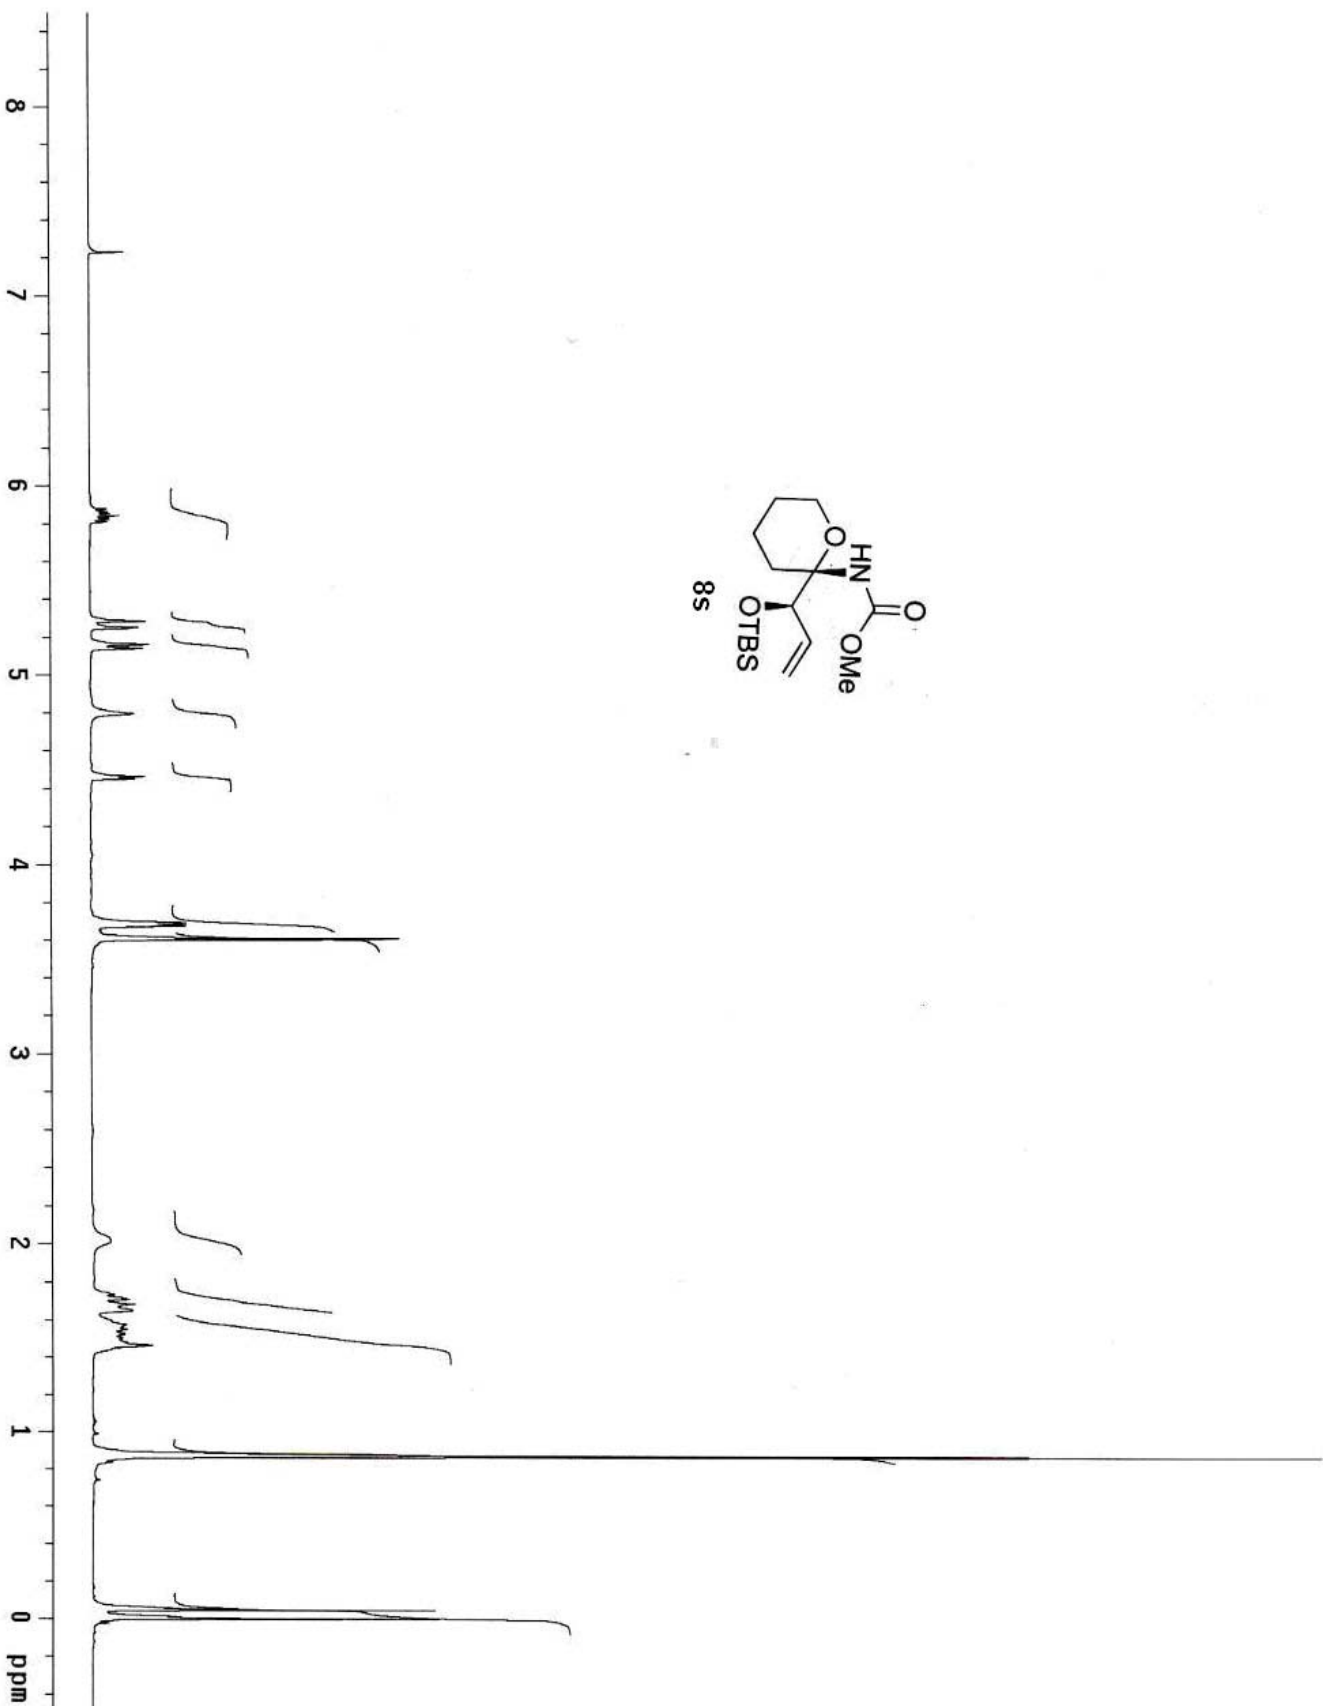

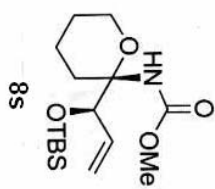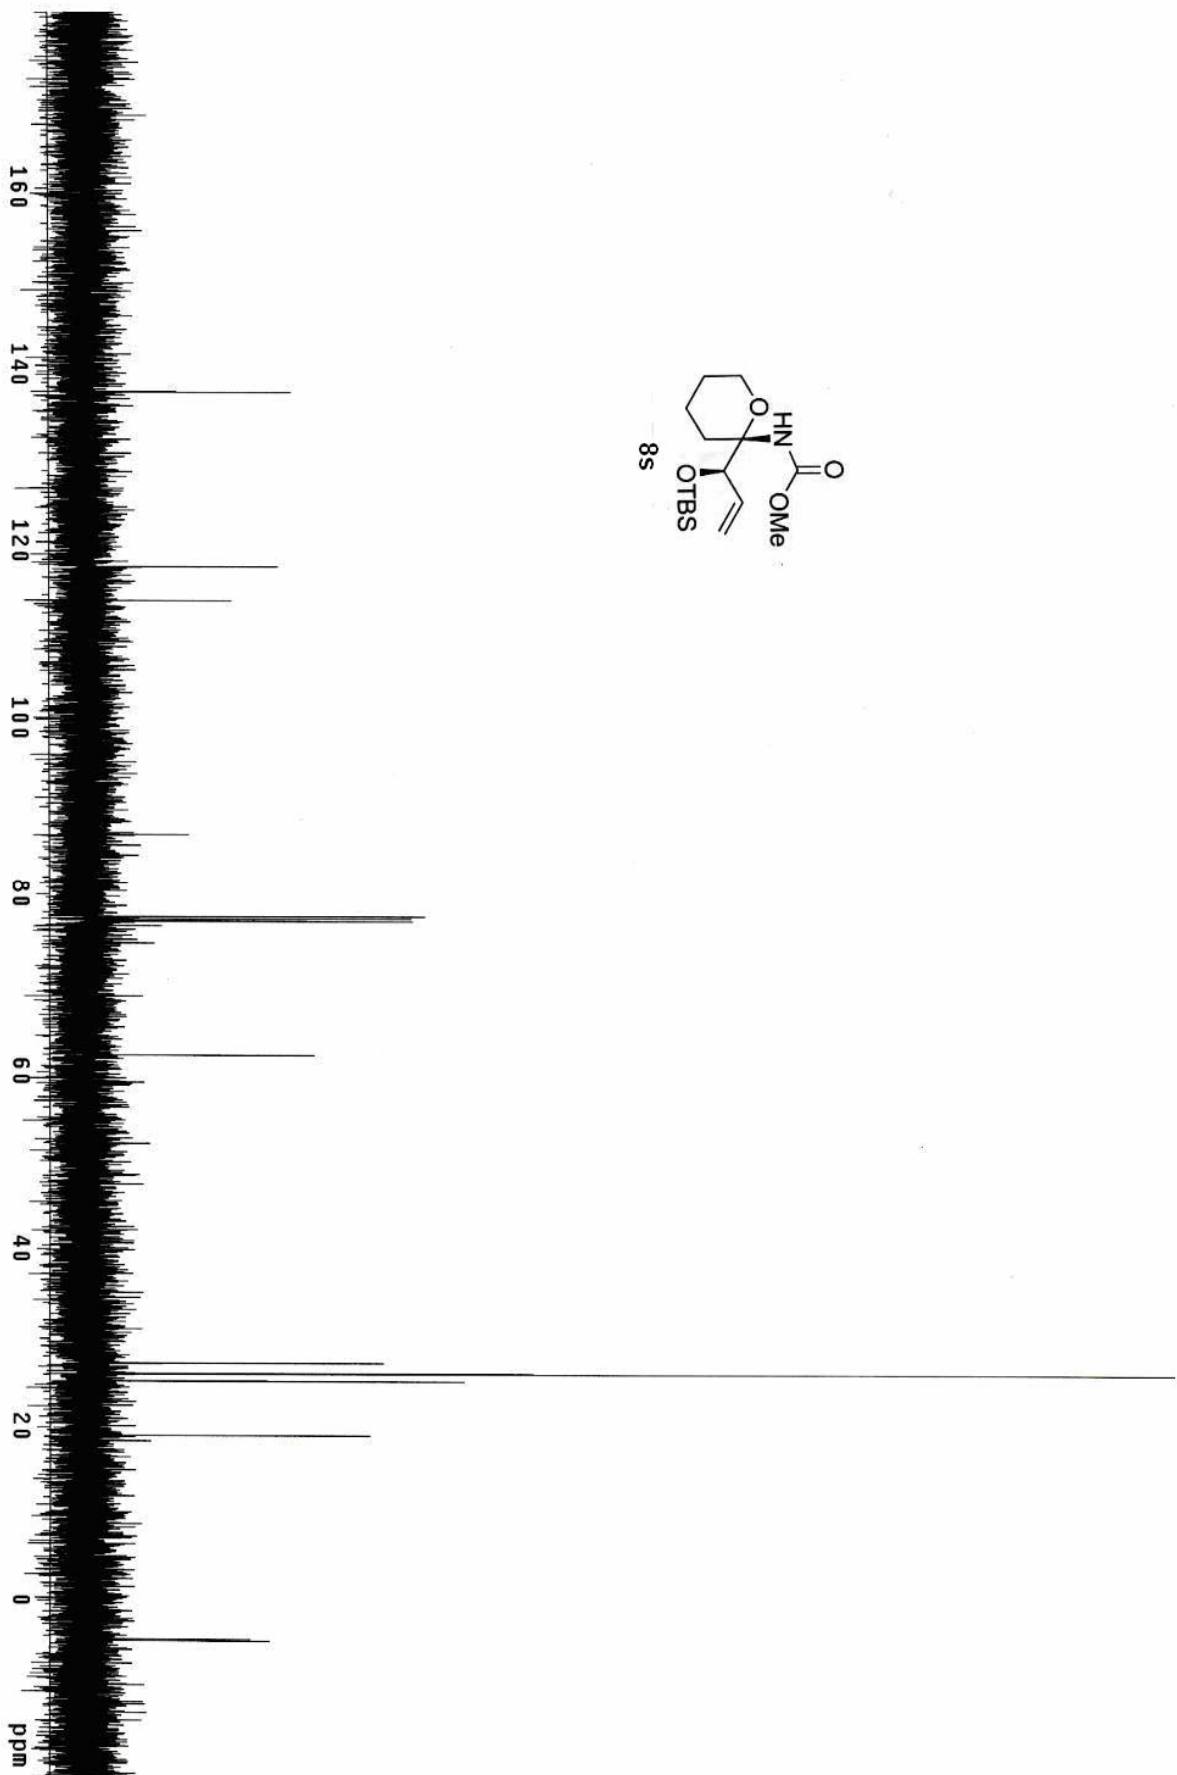

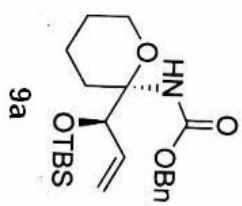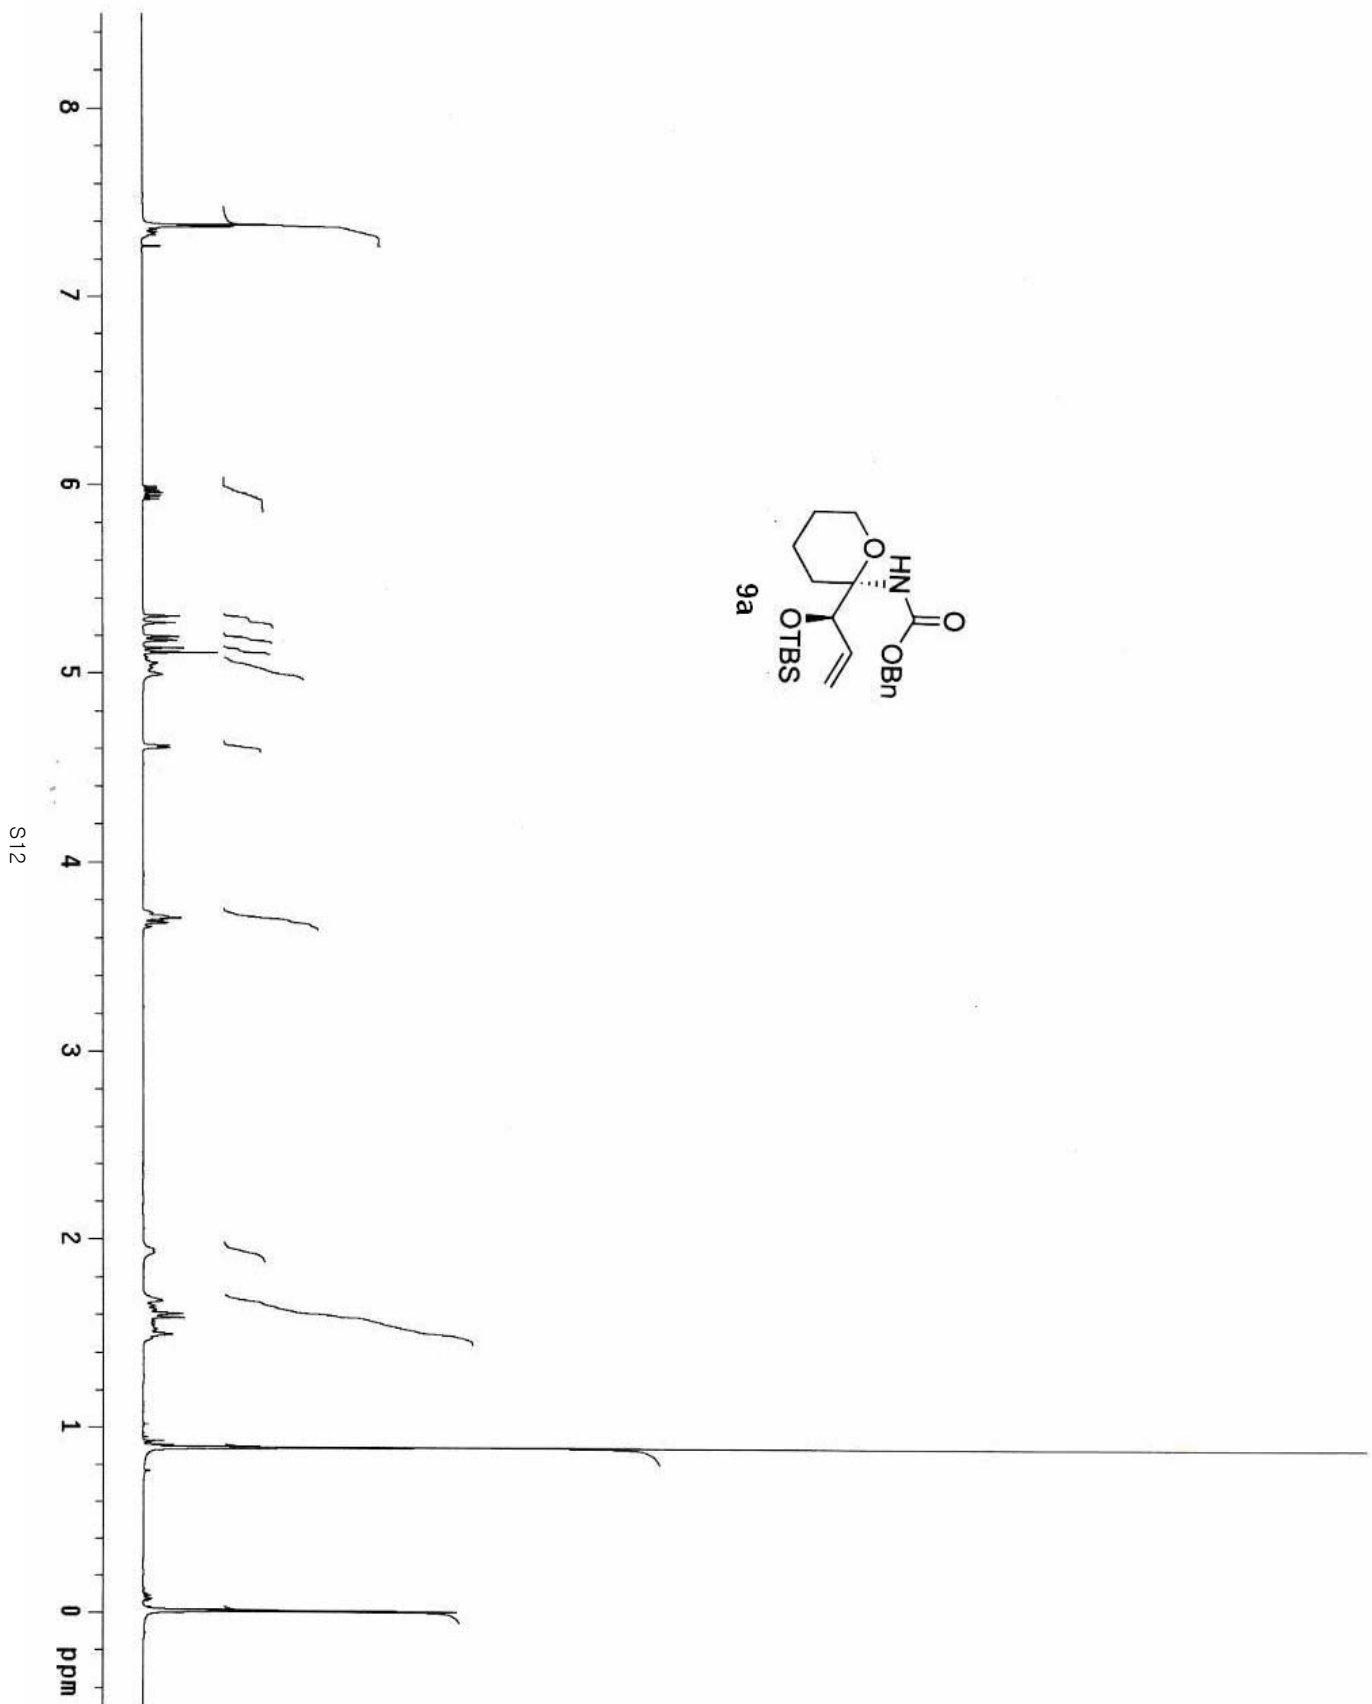

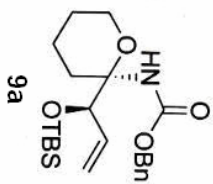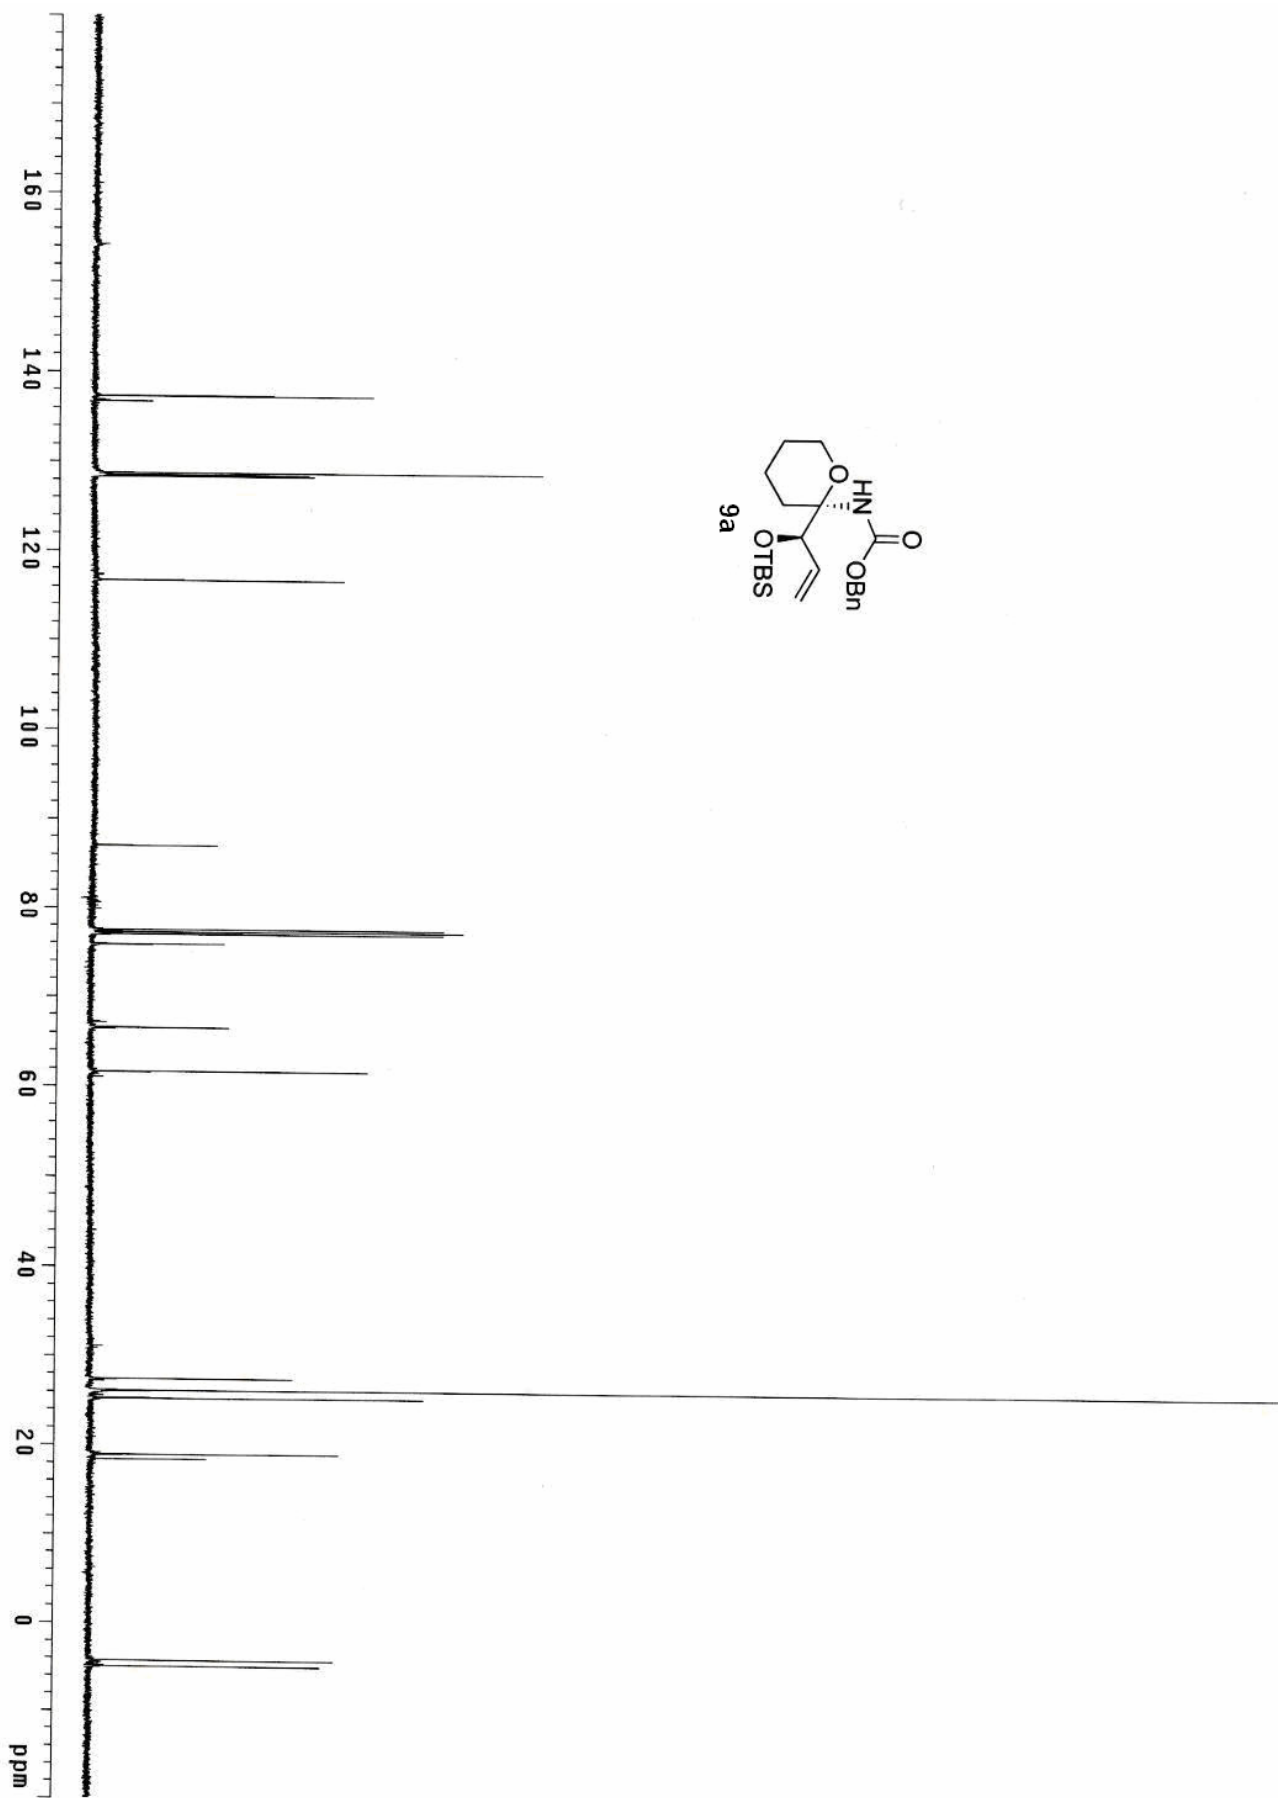



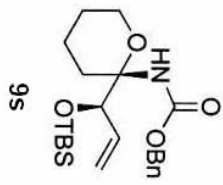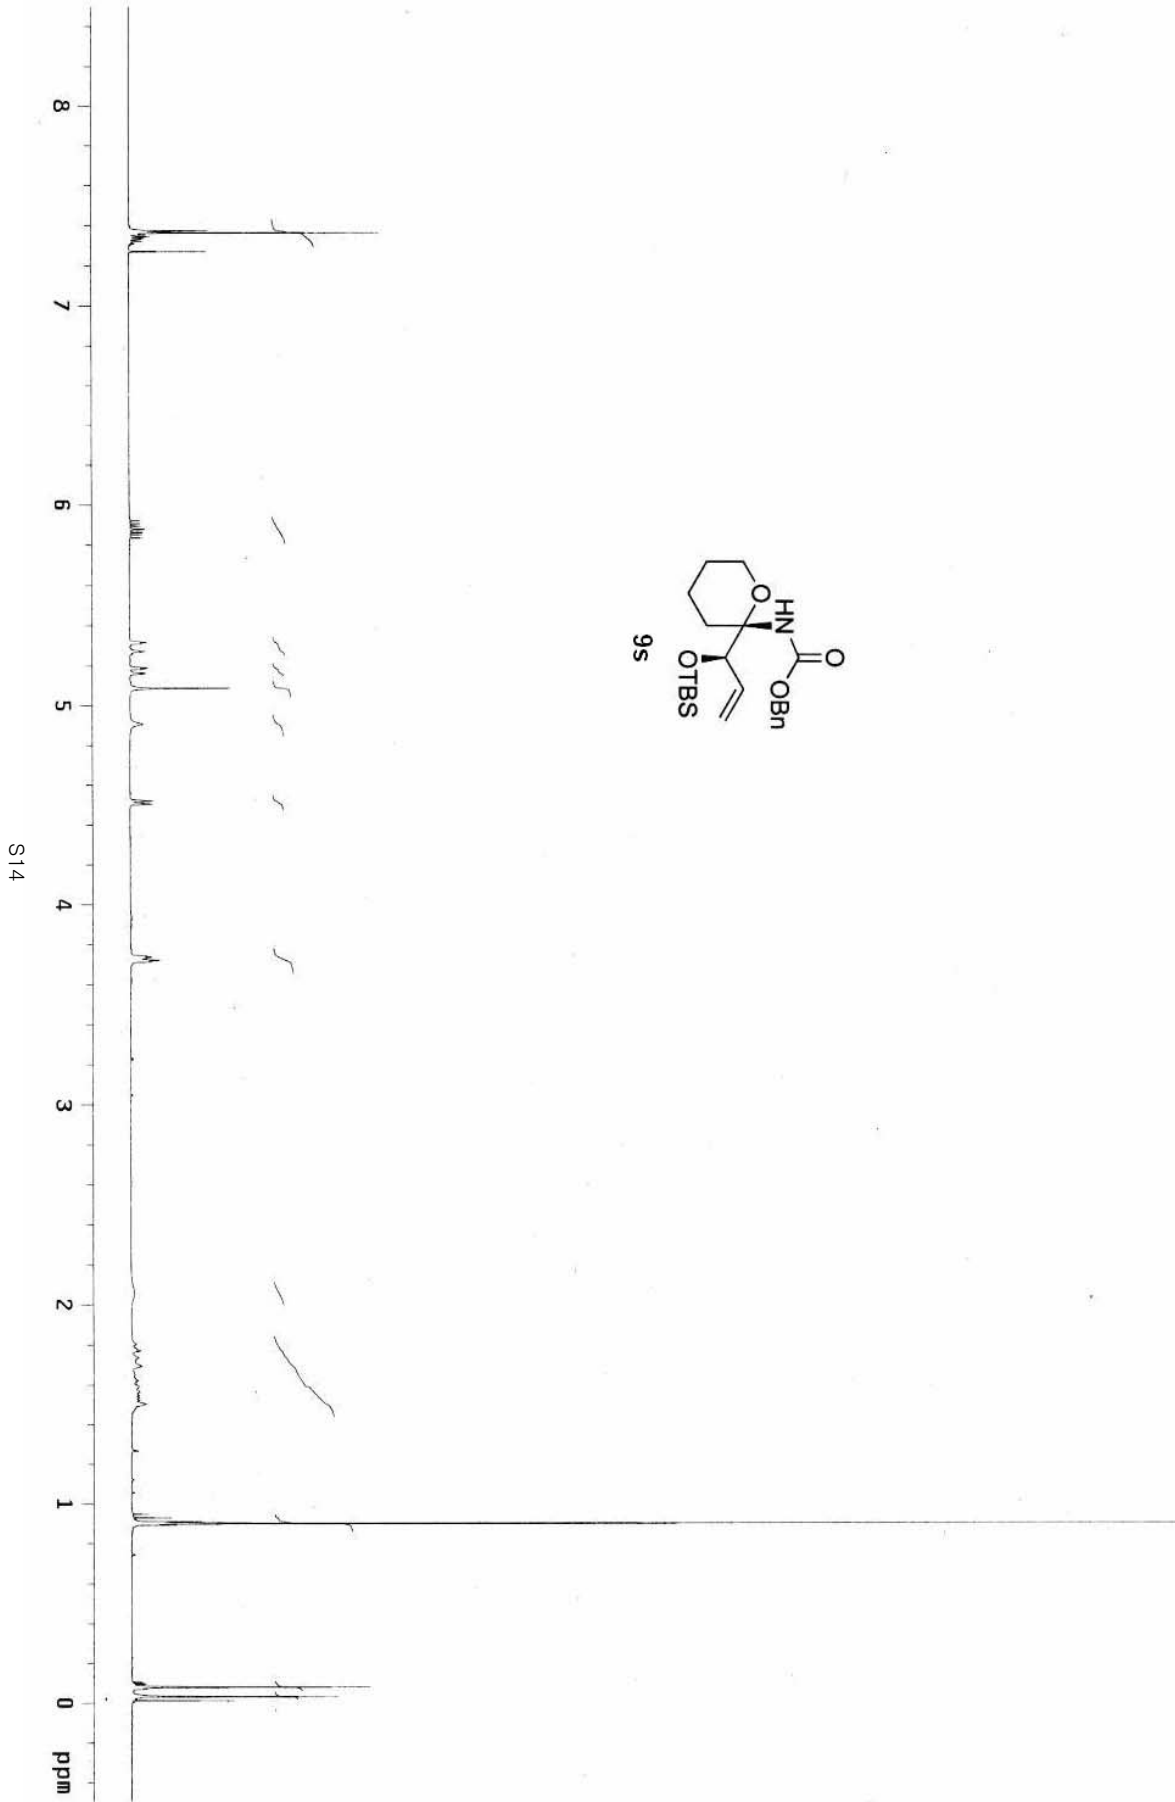

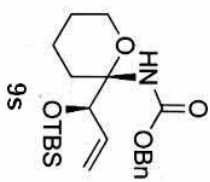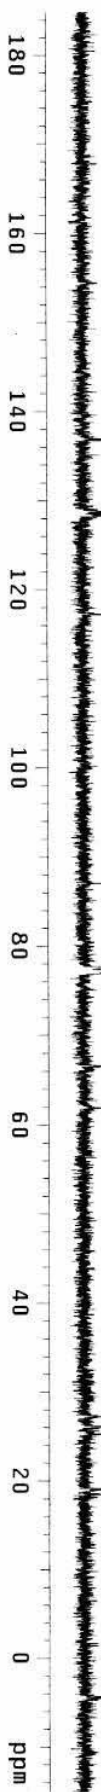

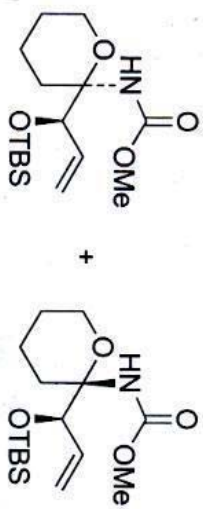

**8a : 8s = 2.3 : 1 mixture**

Carbamate ( 3.0 equiv), Tf<sub>2</sub>NH (0.1 equiv), -78 °C

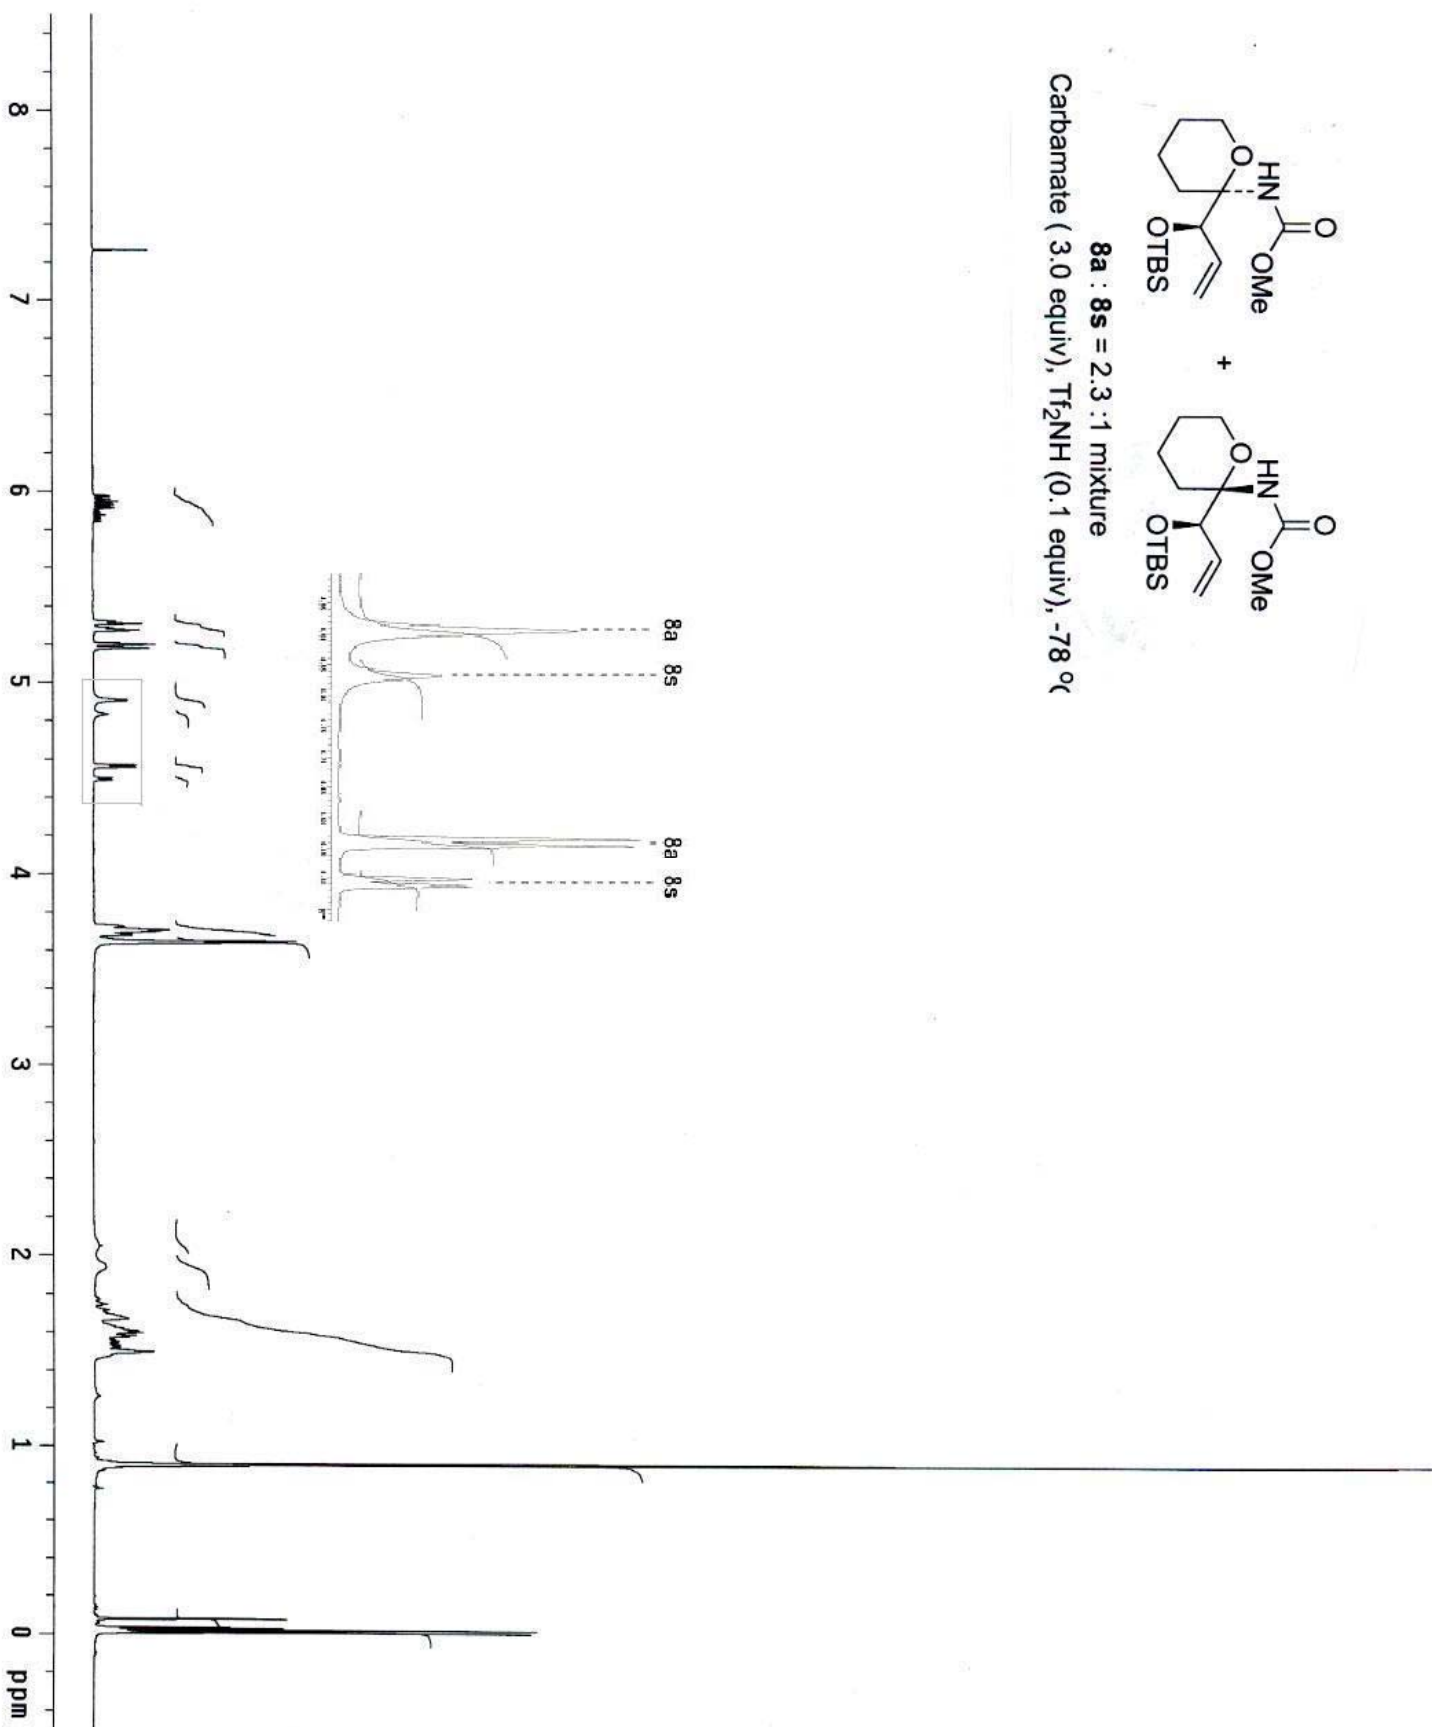

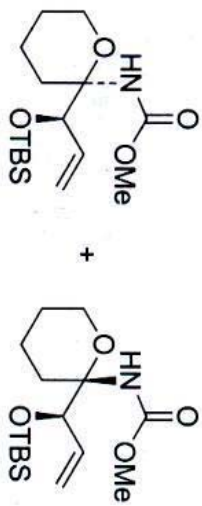

Carbamate (3.0 equiv), Tf<sub>2</sub>NH (0.25 equiv), -78 °C

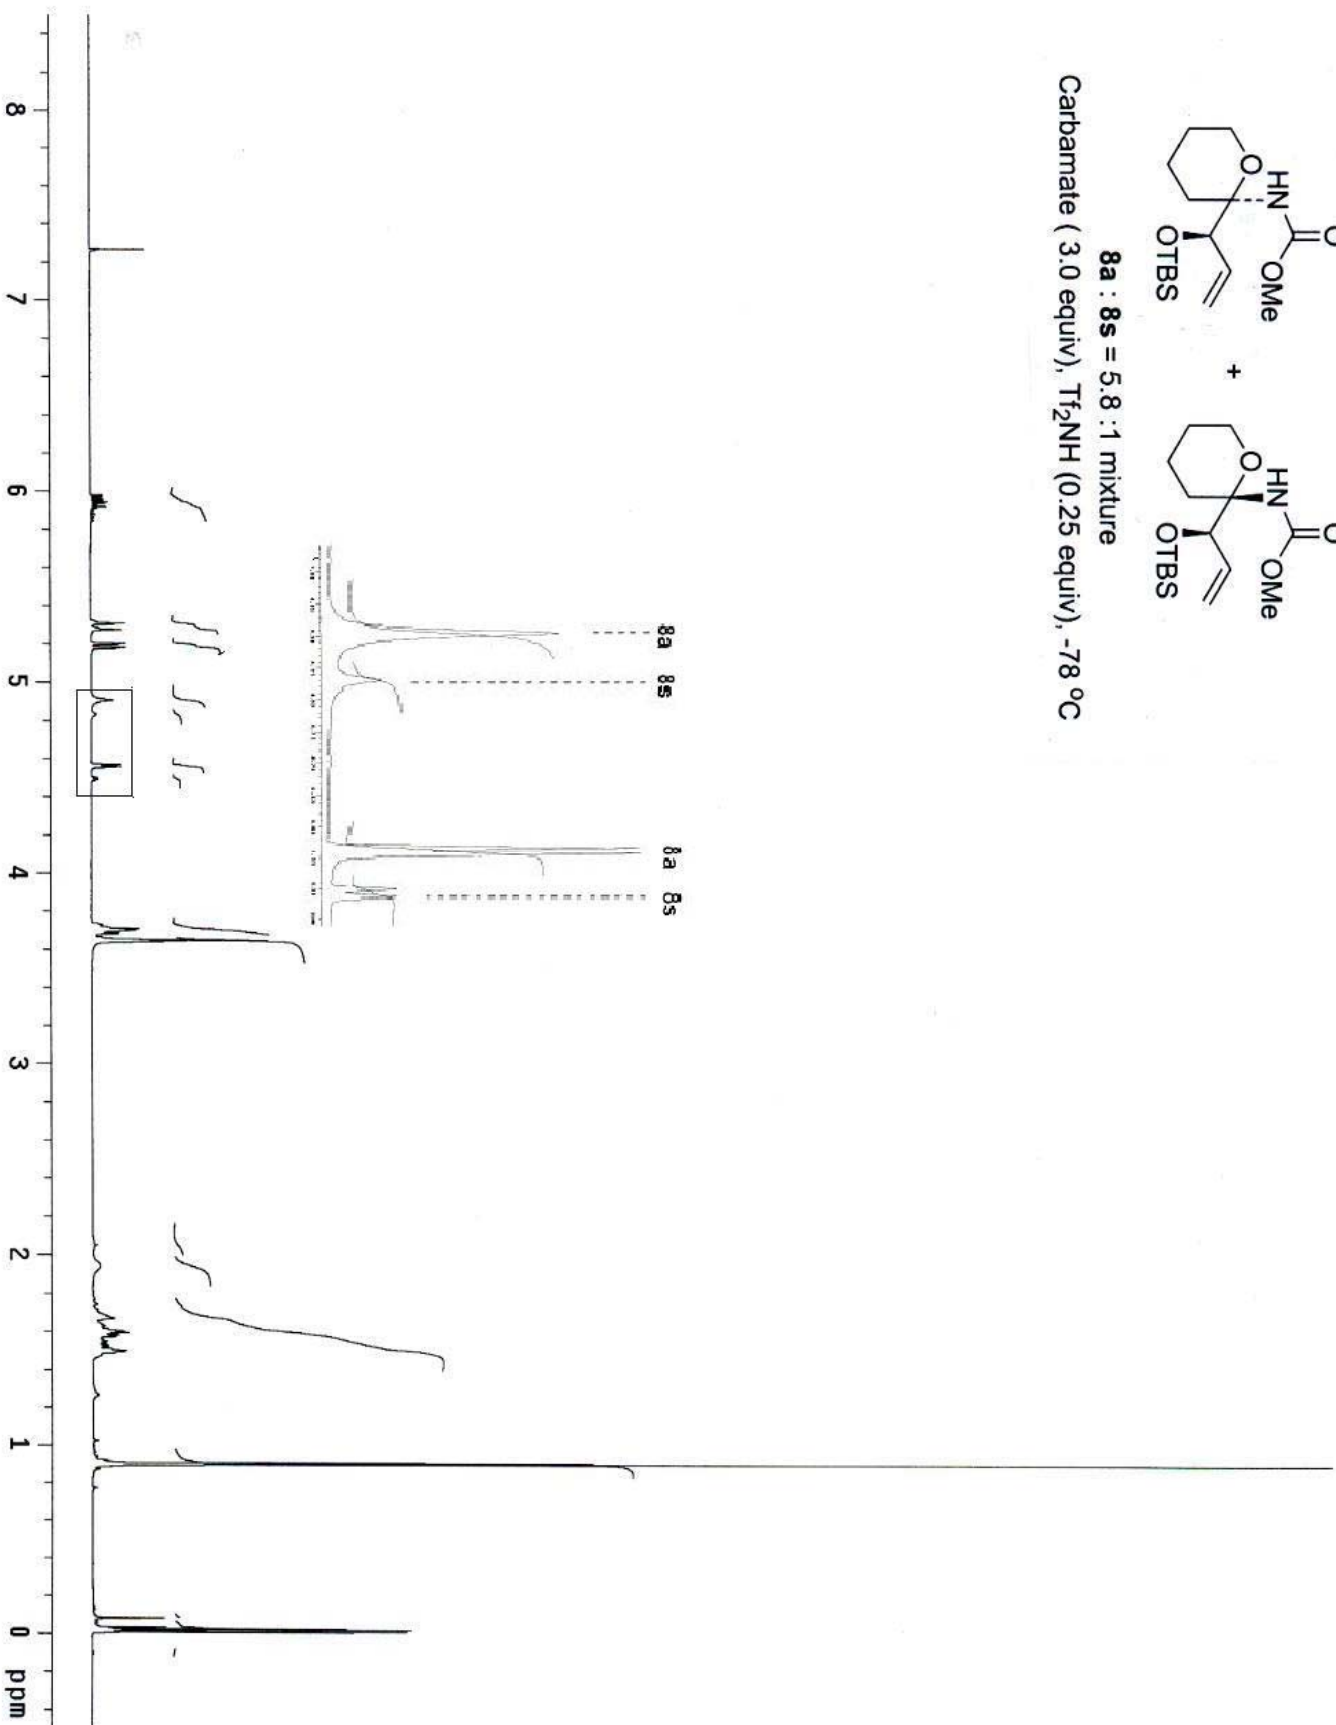

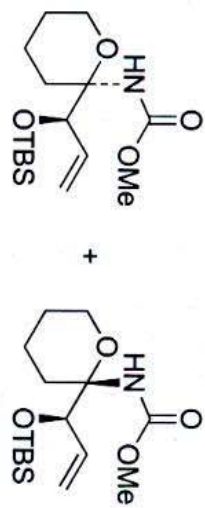

**8a : 8s = 10.3 : 1 mixture**

Carbamate ( 3.0 equiv), Tf<sub>2</sub>NH ( 1.0 equiv), -78 °C

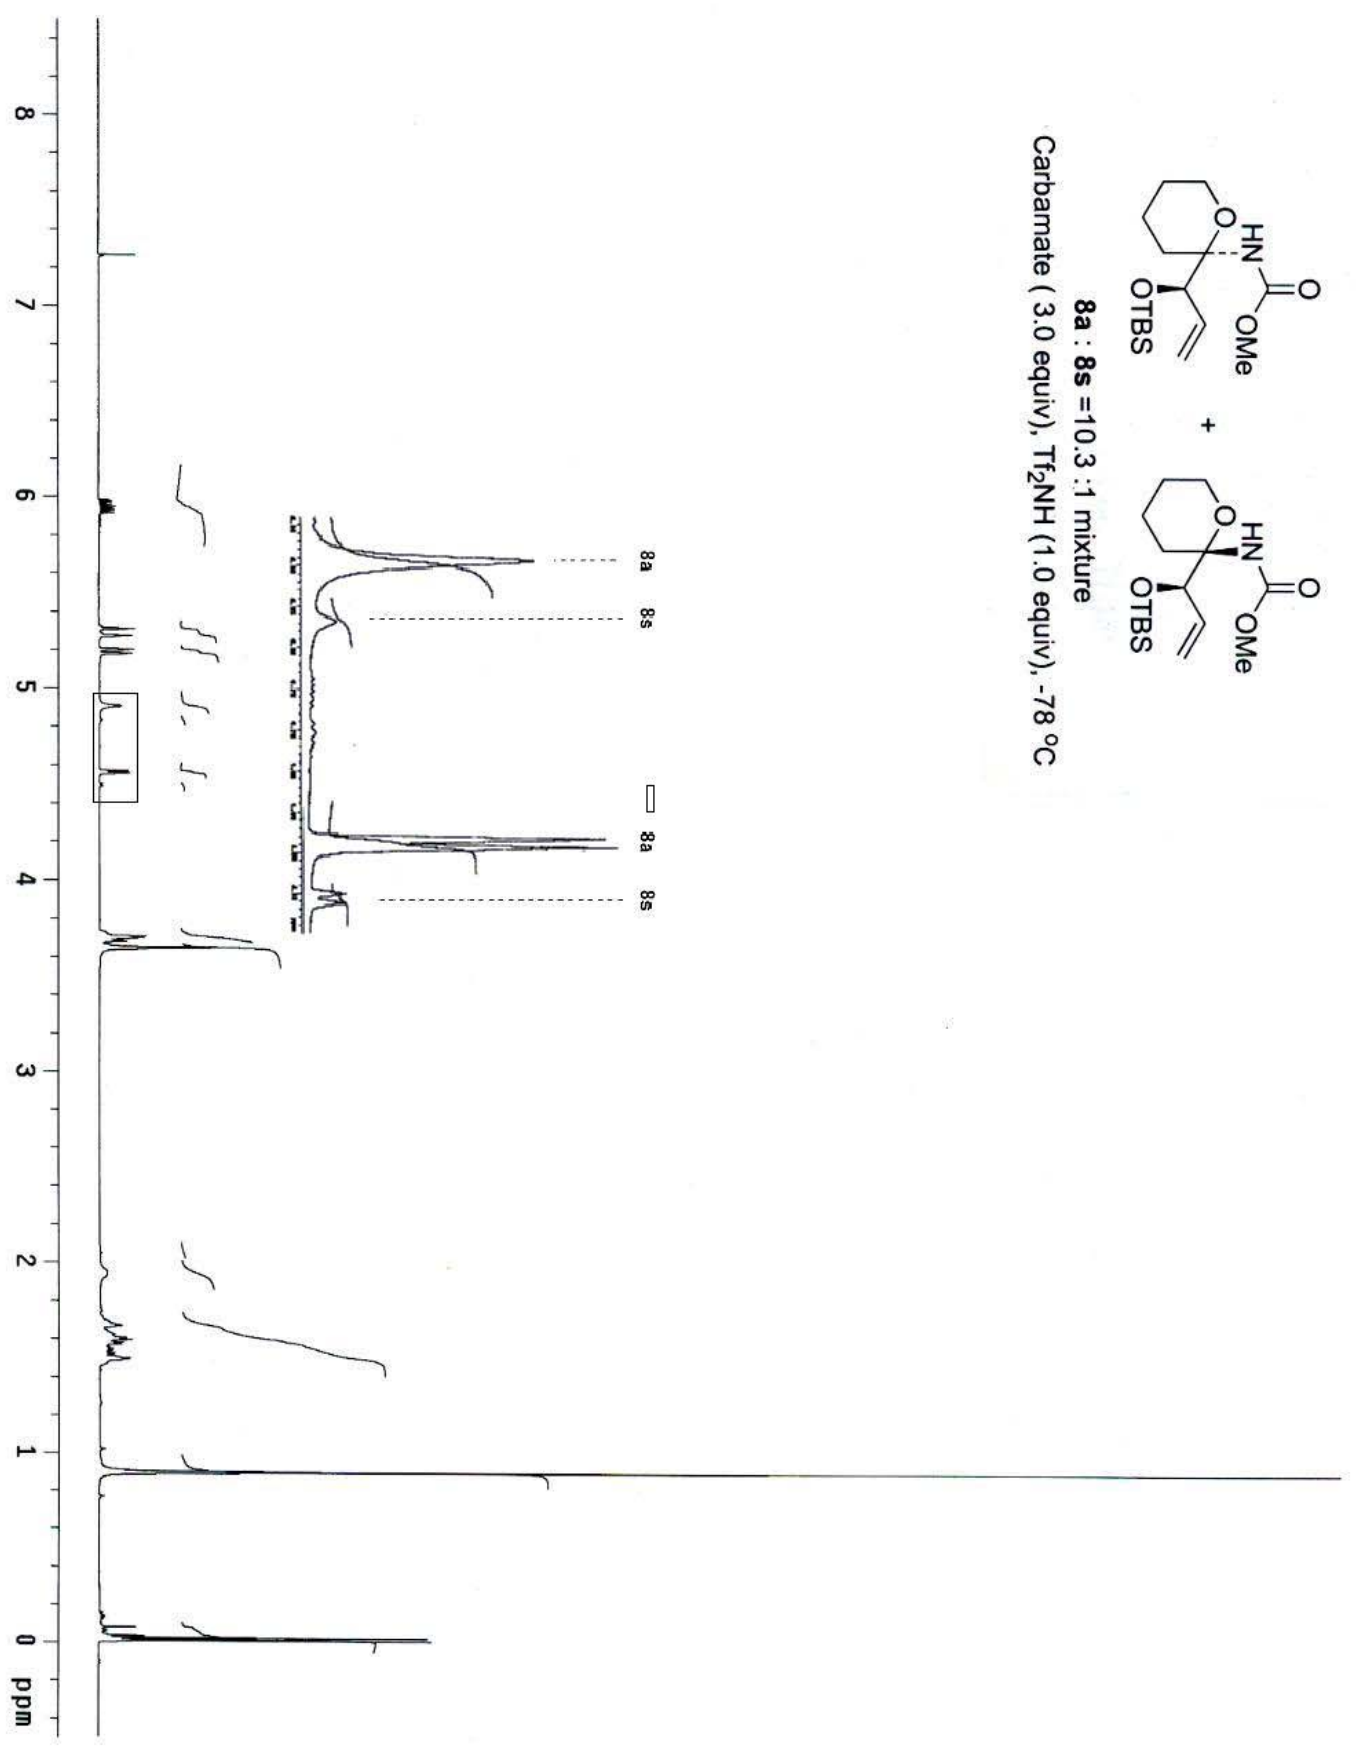

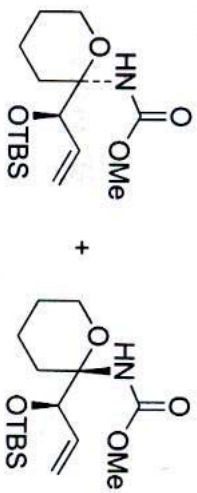

**8a : 8b = >40 : 1 mixture**

Carbamate (3.0 equiv), Tf<sub>2</sub>NH (2.0 equiv), -78 °C

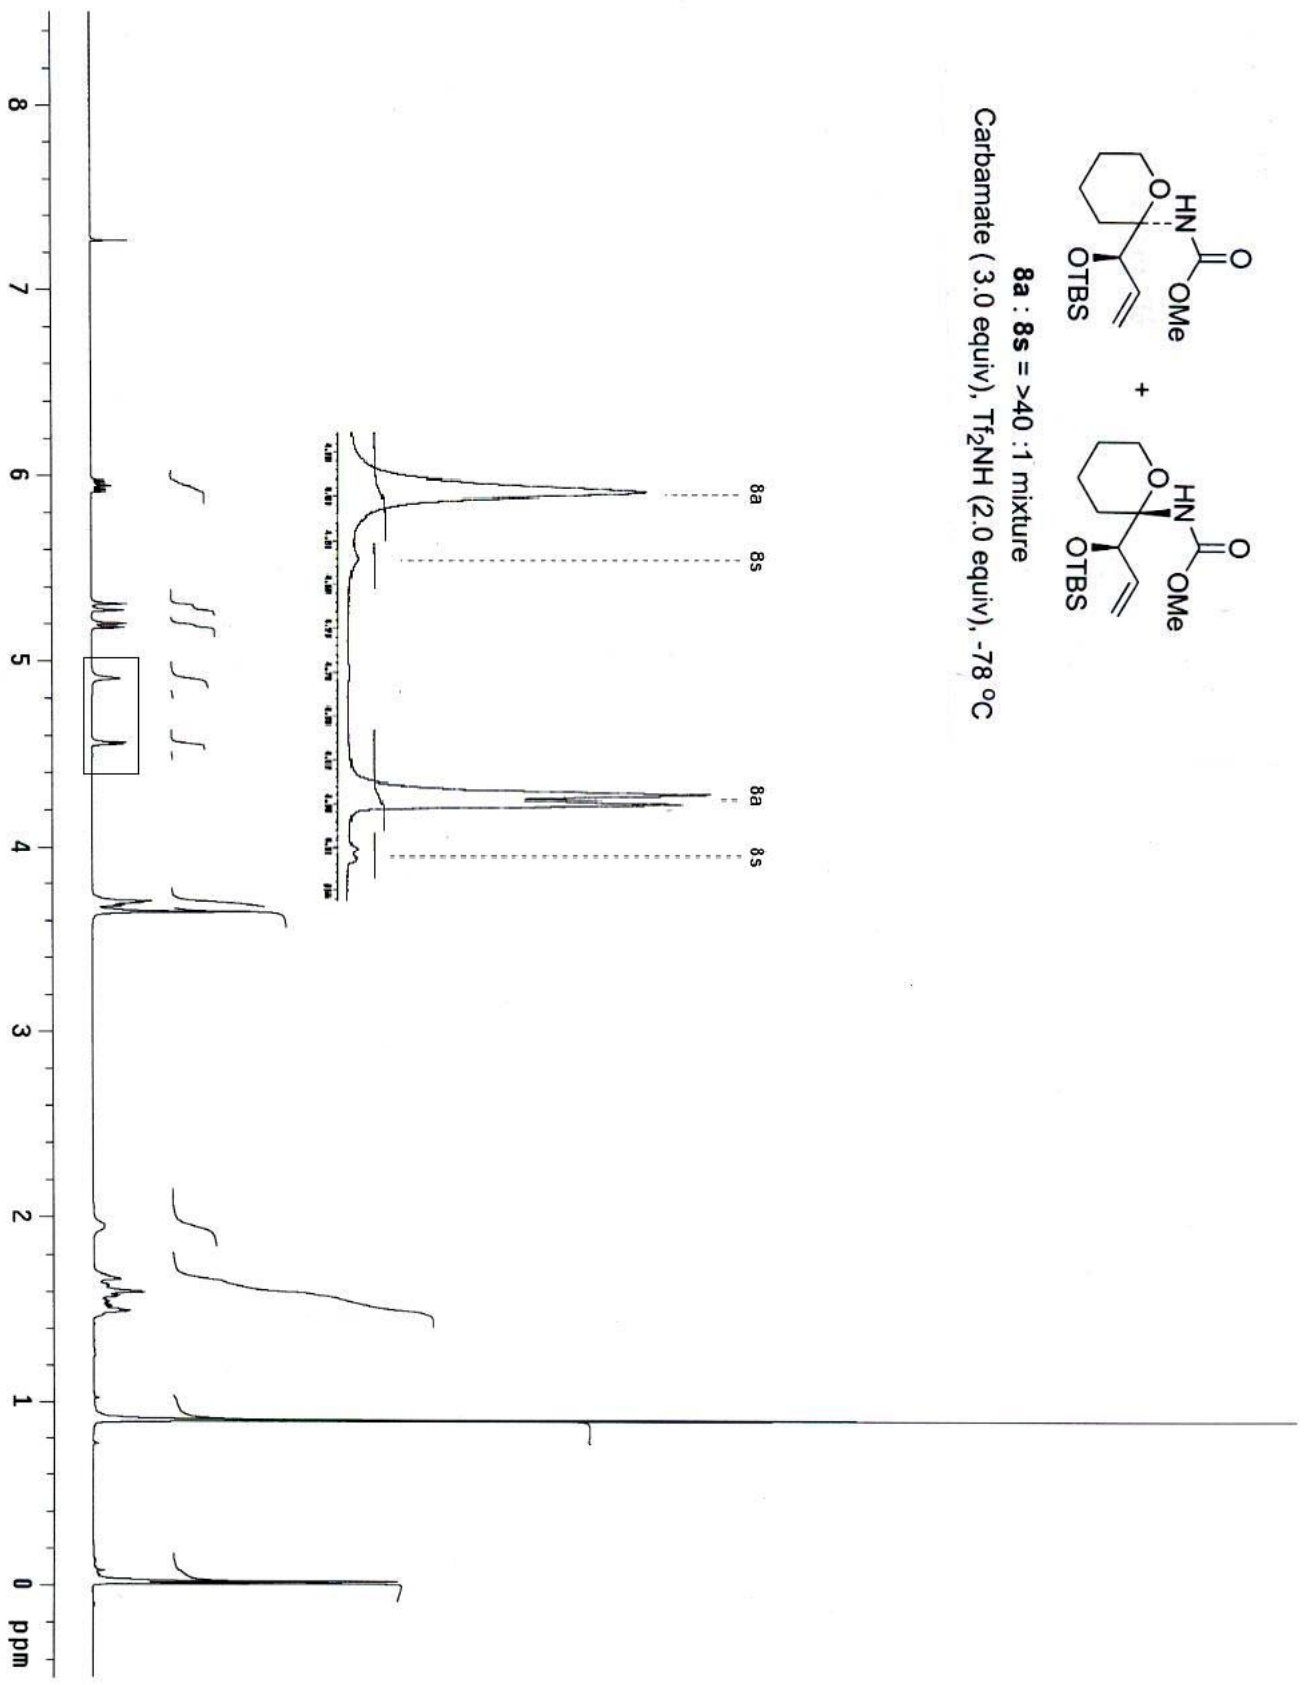

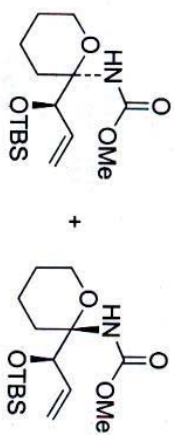

**8a** : **8s** = >40 : 1 mixture

Carbamate (3.0 equiv), Tf<sub>2</sub>NH (2.0 equiv), -78 °C

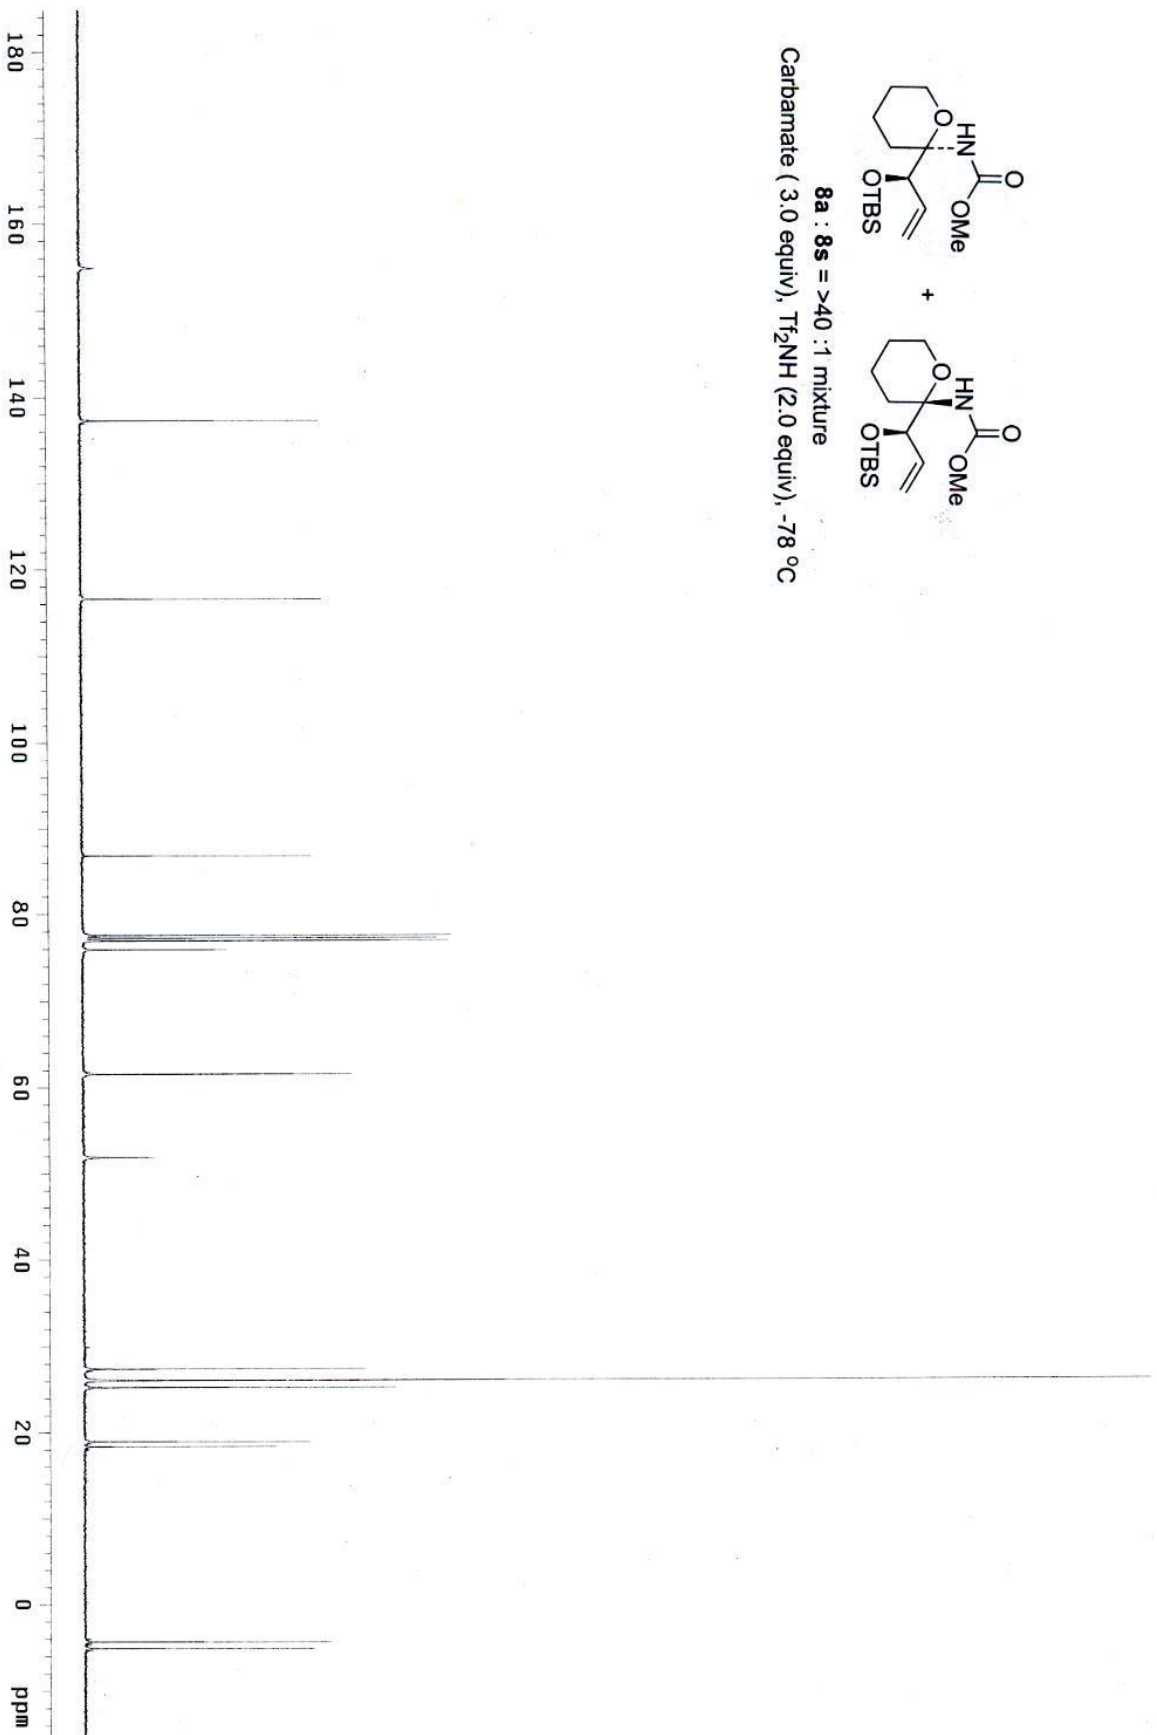





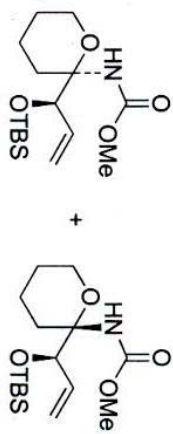

Carbamate (3.0 equiv),  $\text{Ti}_2\text{NH}$  (3.0 equiv),  $-78^\circ\text{C}$

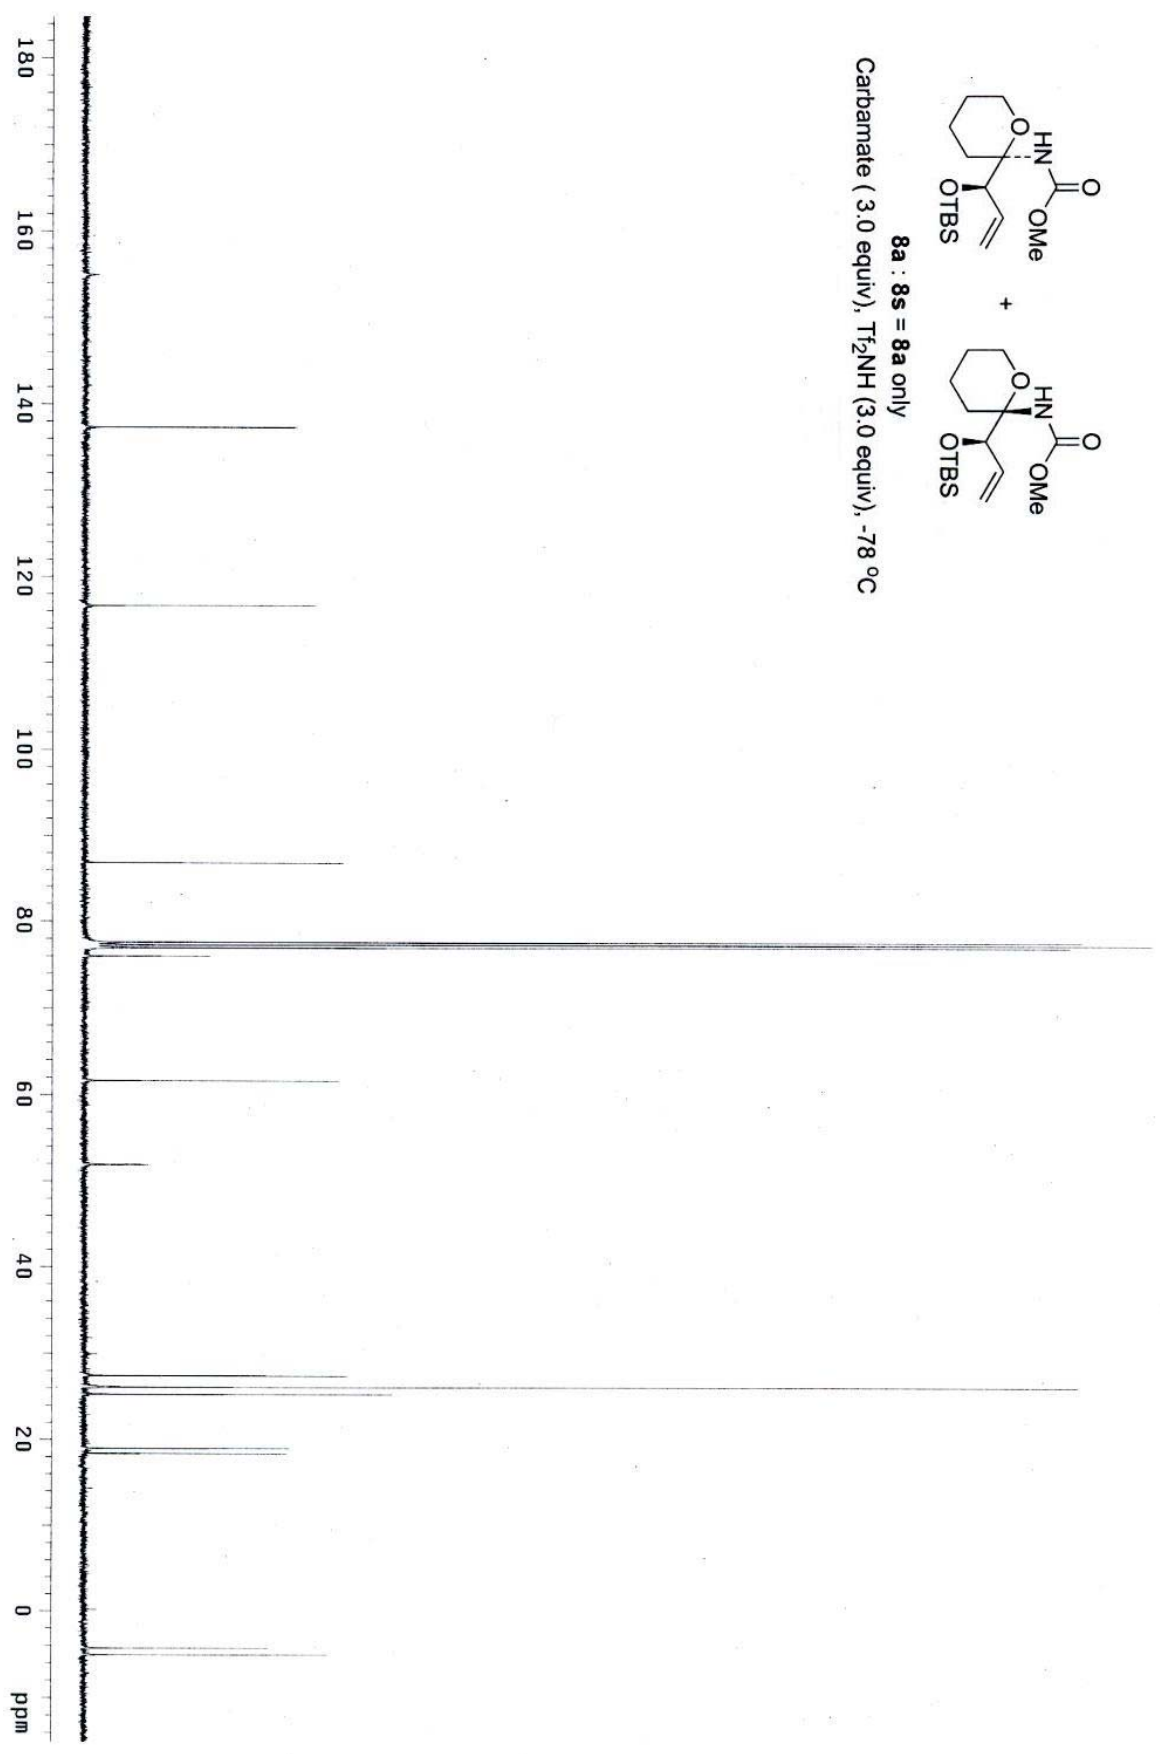

Supplement: b615725d_b.pdf [file b615725d_b.pdf]
